# Supplementary material for: Unravelling Metabolic Heterogeneity of Chinese Baijiu Fermentation in Age-Gradient Vessels
Source: MDPI journal article supplement (doi:10.3390/foods12183425), 2023-09-14

Tables

Table S1. The content of metabolites in three different *Digangs*.

| Compounds |                               | Contents (mg/kg) |        |         |         |         |         |       |        |         |         |         |         |       |        |         |         |         |         |
|-----------|-------------------------------|------------------|--------|---------|---------|---------|---------|-------|--------|---------|---------|---------|---------|-------|--------|---------|---------|---------|---------|
|           |                               | A00              | A05    | A10     | A15     | A20     | A25     | B00   | B05    | B10     | B15     | B20     | B25     | C00   | C05    | C10     | C15     | C20     | C25     |
| 1         | Ethanol                       | 25.09            | 698.39 | 1022.25 | 1390.02 | 1599.48 | 1597.59 | 26.73 | 787.73 | 1052.35 | 1312.06 | 1431.89 | 1529.28 | 25.09 | 754.92 | 1230.37 | 1393.89 | 1458.85 | 1835.31 |
| 2         | Phenethyl alcohol             | 75.96            | 76.99  | 60.29   | 63.69   | 69.20   | 91.63   | 76.18 | 71.41  | 89.27   | 98.53   | 102.49  | 88.99   | 75.96 | 76.99  | 60.29   | 70.86   | 81.03   | 69.20   |
| 3         | 3-Methyl-1-butanol            | 43.01            | 26.13  | 53.72   | 56.24   | 50.24   | 51.75   | 11.45 | 67.72  | 73.85   | 72.97   | 75.45   | 68.63   | 43.01 | 28.47  | 54.61   | 54.28   | 54.02   | 50.24   |
| 4         | 2-Methyl-1-propanol           | 36.33            | 30.02  | 28.72   | 12.30   | 23.78   | 30.25   | 50.75 | 36.20  | 27.18   | 28.49   | 20.41   | 21.37   | 36.33 | 45.48  | 26.50   | 27.26   | 17.53   | 24.20   |
| 5         | 2,3-Butanediol                | 4.24             | 14.28  | 13.30   | 24.03   | 9.76    | 16.35   | 24.38 | 14.37  | 11.86   | 13.10   | 12.48   | 14.98   | 4.24  | 22.63  | 12.63   | 11.70   | 7.68    | 9.78    |
| 6         | 2-Furanylmethanol             | 4.26             | 19.77  | 12.37   | 13.98   | 0.00    | 0.00    | 30.62 | 12.24  | 11.47   | 0.00    | 0.00    | 0.00    | 4.26  | 21.96  | 13.58   | 1.18    | 0.00    | 0.00    |
| 7         | 1,2-Propanediol               | 23.17            | 2.45   | 2.25    | 2.00    | 1.46    | 2.59    | 0.00  | 1.67   | 1.27    | 1.54    | 1.74    | 0.00    | 23.17 | 3.13   | 1.84    | 1.44    | 1.51    | 1.95    |
| 8         | 3-(Methylsulfanyl)-1-propanol | 10.14            | 2.64   | 1.46    | 1.11    | 0.06    | 1.28    | 2.31  | 1.56   | 1.32    | 1.32    | 1.34    | 1.28    | 10.14 | 2.58   | 1.32    | 13.28   | 1.29    | 0.84    |
| 9         | Benzyl alcohol                | 3.50             | 0.00   | 0.00    | 0.00    | 0.00    | 0.00    | 2.67  | 0.00   | 0.00    | 0.00    | 0.00    | 0.00    | 3.50  | 0.00   | 0.00    | 0.00    | 0.00    | 0.00    |
| 10        | Tetraethylene glycol          | 1.04             | 0.00   | 0.00    | 0.00    | 0.00    | 0.00    | 0.00  | 0.00   | 0.00    | 0.00    | 0.00    | 0.00    | 1.04  | 0.00   | 0.00    | 0.00    | 0.00    | 0.00    |
| 11        | DL-sec-iso-Amyl alcohol       | 0.00             | 0.00   | 0.00    | 0.00    | 0.65    | 0.00    | 0.00  | 0.00   | 0.00    | 0.00    | 0.67    | 0.46    | 0.00  | 0.00   | 0.00    | 0.00    | 0.00    | 0.00    |
| 12        | Ethyl oleate                  | 9.40             | 1.66   | 4.70    | 5.57    | 6.55    | 5.70    | 6.21  | 2.67   | 4.17    | 5.12    | 6.13    | 5.24    | 9.40  | 7.25   | 3.91    | 5.28    | 6.35    | 5.57    |
| 13        | 2-Phenethyl isobutyrate       | 0.00             | 1.54   | 1.42    | 0.45    | 1.63    | 2.78    | 0.00  | 0.98   | 1.17    | 1.43    | 1.37    | 1.43    | 0.00  | 1.52   | 1.51    | 1.48    | 1.51    | 1.50    |
| 14        | 3-Methyl-1-butyl acetate      | 13.92            | 9.23   | 9.13    | 9.53    | 6.02    | 9.51    | 12.42 | 9.19   | 8.64    | 9.41    | 5.67    | 9.23    | 13.92 | 7.62   | 6.22    | 9.99    | 7.68    | 4.26    |
| 15        | Ethyl acetate                 | 22.35            | 108.13 | 157.88  | 216.99  | 240.30  | 297.07  | 19.68 | 110.72 | 160.28  | 176.28  | 195.25  | 234.95  | 22.35 | 80.24  | 153.07  | 183.17  | 179.62  | 218.92  |



|    |                            |       |       |       |       |       |       |       |       |       |       |       |       |       |       |       |       |       |       |
|----|----------------------------|-------|-------|-------|-------|-------|-------|-------|-------|-------|-------|-------|-------|-------|-------|-------|-------|-------|-------|
| 35 | Propyl 2-methylvalerate    | 0.00  | 0.00  | 0.00  | 0.00  | 0.00  | 0.00  | 0.00  | 2.07  | 0.00  | 0.00  | 0.00  | 0.00  | 0.00  | 0.00  | 0.00  | 0.00  | 0.00  | 0.00  |
| 36 | Methyl 2-methylpentanoate  | 0.00  | 2.21  | 0.00  | 0.00  | 0.00  | 0.00  | 0.00  | 0.00  | 0.00  | 0.00  | 0.00  | 0.00  | 0.00  | 0.00  | 0.00  | 0.00  | 0.00  | 0.00  |
| 37 | Stearic acid               | 0.00  | 0.00  | 0.00  | 0.00  | 0.00  | 0.00  | 0.00  | 0.00  | 0.00  | 0.00  | 0.00  | 0.00  | 0.00  | 0.72  | 0.00  | 0.00  | 0.00  | 0.00  |
| 38 | Acetic acid                | 13.26 | 41.52 | 60.00 | 48.37 | 38.55 | 36.32 | 15.52 | 43.16 | 60.59 | 46.48 | 44.24 | 41.28 | 13.26 | 33.66 | 44.24 | 35.72 | 38.39 | 27.74 |
| 39 | Octanoic acid              | 0.00  | 2.32  | 1.65  | 1.00  | 0.63  | 1.27  | 0.00  | 2.11  | 1.82  | 1.41  | 1.39  | 1.00  | 0.00  | 3.74  | 2.16  | 0.48  | 0.49  | 0.47  |
| 40 | Nonanoic acid              | 0.00  | 0.71  | 0.00  | 0.00  | 0.00  | 0.00  | 0.00  | 0.00  | 0.00  | 0.00  | 0.00  | 0.00  | 0.00  | 0.00  | 0.00  | 0.00  | 0.00  | 0.00  |
| 41 | Hexanoic acid              | 0.00  | 2.40  | 1.44  | 1.82  | 3.31  | 0.87  | 0.00  | 1.81  | 2.02  | 2.17  | 2.29  | 0.97  | 0.00  | 3.27  | 1.91  | 1.13  | 4.91  | 0.83  |
| 42 | Butyric acid               | 0.00  | 1.45  | 0.00  | 0.00  | 0.00  | 0.00  | 0.00  | 2.20  | 2.49  | 2.08  | 2.14  | 0.00  | 0.00  | 1.19  | 0.00  | 0.00  | 0.00  | 0.00  |
| 43 | 2-Ethylheptanoic acid      | 0.00  | 0.00  | 0.26  | 0.00  | 0.00  | 0.00  | 2.65  | 0.20  | 0.37  | 0.94  | 0.00  | 0.00  | 0.00  | 0.00  | 0.19  | 0.35  | 1.22  | 0.00  |
| 44 | 2-Methoxyphenol            | 0.00  | 0.00  | 0.00  | 0.00  | 0.84  | 0.14  | 0.00  | 0.00  | 0.00  | 0.00  | 0.00  | 0.18  | 0.00  | 0.00  | 0.00  | 0.00  | 0.97  | 0.11  |
| 45 | 2-Ethylphenol              | 0.00  | 0.55  | 0.00  | 0.50  | 0.00  | 0.00  | 0.00  | 0.63  | 0.00  | 0.00  | 0.00  | 0.00  | 0.00  | 0.00  | 0.64  | 0.00  | 0.27  | 0.64  |
| 46 | 4-Methylphenol             | 0.11  | 0.00  | 0.00  | 0.00  | 0.00  | 0.00  | 0.59  | 0.00  | 0.00  | 0.00  | 0.00  | 0.00  | 0.11  | 0.00  | 0.00  | 0.00  | 0.00  | 0.00  |
| 47 | 4-Methylguaiacol           | 1.78  | 1.35  | 0.97  | 1.14  | 0.34  | 1.99  | 0.37  | 1.46  | 2.12  | 3.94  | 5.89  | 6.27  | 1.78  | 2.41  | 1.28  | 1.46  | 1.97  | 1.84  |
| 48 | 4-Ethylphenol              | 0.28  | 0.00  | 0.52  | 0.00  | 1.77  | 0.65  | 1.71  | 0.00  | 0.85  | 0.97  | 1.28  | 1.13  | 0.28  | 0.00  | 0.00  | 0.49  | 0.51  | 0.00  |
| 49 | 4-Ethyl-2-methoxyphenol    | 2.67  | 2.64  | 2.02  | 2.07  | 0.48  | 0.52  | 0.44  | 3.30  | 4.29  | 5.74  | 7.93  | 0.70  | 2.67  | 4.41  | 2.17  | 2.57  | 3.62  | 3.26  |
| 50 | Phenol                     | 0.28  | 0.50  | 0.36  | 0.32  | 3.26  | 0.33  | 3.87  | 0.54  | 0.51  | 0.46  | 0.49  | 0.40  | 0.28  | 0.63  | 0.45  | 0.35  | 0.32  | 0.31  |
| 51 | 4-Hydroxy-3-methoxystyrene | 1.10  | 2.33  | 1.33  | 1.93  | 1.43  | 1.28  | 0.00  | 1.33  | 2.29  | 2.43  | 2.11  | 0.64  | 1.10  | 2.76  | 1.30  | 2.48  | 3.06  | 1.98  |

|    |                               |      |      |       |       |       |      |      |      |      |       |       |       |      |       |       |      |      |       |
|----|-------------------------------|------|------|-------|-------|-------|------|------|------|------|-------|-------|-------|------|-------|-------|------|------|-------|
| 52 | 2-Methoxy-4-propyl-<br>Phenol | 0.00 | 0.00 | 0.00  | 0.00  | 0.00  | 0.00 | 0.55 | 0.00 | 0.00 | 0.00  | 0.00  | 0.00  | 0.00 | 0.00  | 0.00  | 0.00 | 0.00 | 0.00  |
| 53 | 2-Methoxyacetophenone         | 7.77 | 0.00 | 0.00  | 10.41 | 16.22 | 3.95 | 0.00 | 0.00 | 0.00 | 0.00  | 3.63  | 0.00  | 7.77 | 0.00  | 16.12 | 4.75 | 8.12 | 2.87  |
| 54 | 2-Amylfuran                   | 0.00 | 2.70 | 1.25  | 0.00  | 0.00  | 0.00 | 3.50 | 0.00 | 0.00 | 0.00  | 0.00  | 0.00  | 0.00 | 3.35  | 0.00  | 0.00 | 0.00 | 0.00  |
| 55 | 3-Methyl-2(5H)-<br>furanone   | 0.00 | 0.15 | 0.06  | 0.07  | 0.00  | 0.00 | 0.00 | 0.15 | 0.06 | 0.07  | 0.00  | 0.00  | 0.00 | 0.15  | 0.06  | 0.07 | 0.00 | 0.00  |
| 56 | 3-Hydroxy-2-oxobutane         | 0.00 | 3.27 | 11.69 | 0.00  | 0.00  | 0.00 | 0.00 | 2.73 | 5.48 | 0.00  | 0.00  | 0.00  | 0.00 | 6.08  | 15.77 | 1.23 | 0.00 | 0.00  |
| 57 | Benzaldehyde                  | 7.85 | 4.23 | 4.04  | 4.59  | 7.51  | 7.28 | 6.12 | 3.07 | 4.78 | 10.03 | 11.08 | 9.89  | 7.85 | 4.82  | 3.10  | 3.80 | 7.34 | 7.49  |
| 58 | Phenylacetaldehyde            | 0.76 | 4.49 | 9.41  | 7.37  | 9.74  | 0.00 | 0.00 | 0.00 | 0.00 | 0.00  | 0.00  | 15.53 | 0.76 | 11.99 | 6.59  | 9.13 | 8.05 | 27.13 |
| 59 | Mesyl anhydride               | 0.00 | 0.00 | 2.28  | 2.50  | 1.71  | 1.28 | 0.00 | 1.87 | 2.34 | 1.48  | 1.86  | 1.31  | 0.00 | 1.63  | 2.58  | 2.43 | 1.26 | 1.42  |
| 60 | Oxime-, methoxy-<br>phenyl-   | 0.00 | 1.61 | 1.61  | 1.91  | 1.77  | 2.23 | 0.98 | 3.69 | 2.85 | 2.80  | 1.83  | 1.74  | 0.00 | 1.74  | 1.55  | 2.41 | 1.36 | 0.92  |
| 61 | (E)-β-Farnesene               | 0.00 | 1.05 | 0.69  | 0.75  | 0.76  | 0.00 | 0.00 | 0.00 | 0.90 | 1.02  | 0.00  | 0.00  | 0.00 | 1.37  | 0.62  | 0.74 | 0.92 | 0.75  |
| 62 | Furfural                      | 0.00 | 0.00 | 0.00  | 0.00  | 0.00  | 0.00 | 3.03 | 0.00 | 0.00 | 0.00  | 0.00  | 0.00  | 0.00 | 0.00  | 0.00  | 0.00 | 0.00 | 0.00  |
| 63 | Nonanal                       | 0.00 | 0.00 | 0.00  | 0.00  | 2.84  | 0.00 | 0.00 | 0.00 | 0.00 | 0.00  | 0.00  | 0.00  | 0.00 | 0.00  | 0.00  | 0.00 | 0.00 | 1.70  |
| 64 | Tetramethylpyrazine           | 0.00 | 0.00 | 0.00  | 0.00  | 0.00  | 0.00 | 0.00 | 0.00 | 0.00 | 0.00  | 0.00  | 0.00  | 0.00 | 0.00  | 0.28  | 0.00 | 0.00 | 0.00  |

Table S2. Bacterial and fungal microbiota diversity index based on 16S rRNA and ITS amplicons sequencing across samples.

|          | ID       | A05    | A10    | A15    | A20    | A25    | B05    | B10    | B15   | B20    | B25    | C05    | C10    | C15    | C20    | C25    |
|----------|----------|--------|--------|--------|--------|--------|--------|--------|-------|--------|--------|--------|--------|--------|--------|--------|
| Bacteria | shannon  | 2.830  | 2.157  | 2.333  | 0.464  | 0.725  | 2.104  | 0.099  | 0.070 | 0.008  | 0.004  | 2.583  | 2.156  | 0.170  | 0.188  | 0.951  |
|          | simpson  | 0.789  | 0.604  | 0.737  | 0.124  | 0.237  | 0.627  | 0.017  | 0.013 | 0.001  | 0.001  | 0.761  | 0.724  | 0.034  | 0.045  | 0.352  |
|          | chao1    | 45.667 | 65.143 | 50.429 | 24.200 | 12.500 | 74.000 | 19.250 | 8.250 | 4.000  | 2.000  | 31.000 | 32.670 | 13.600 | 6.000  | 9.500  |
|          | goods    |        |        |        |        |        |        |        |       |        |        |        |        |        |        |        |
|          | coverage | 0.997  | 0.995  | 0.996  | 0.998  | 0.999  | 0.993  | 0.998  | 0.999 | 0.999  | 1.000  | 0.998  | 0.997  | 0.999  | 1.000  | 0.999  |
| Fungi    | shannon  | 1.747  | 0.975  | 0.964  | 0.600  | 0.123  | 0.575  | 0.408  | 0.200 | 0.336  | 0.250  | 2.196  | 0.443  | 0.346  | 0.255  | 0.400  |
|          | simpson  | 0.556  | 0.392  | 0.432  | 0.160  | 0.023  | 0.180  | 0.115  | 0.053 | 0.076  | 0.055  | 0.668  | 0.118  | 0.083  | 0.065  | 0.108  |
|          | chao1    | 28.200 | 13.500 | 17.500 | 14.500 | 28.000 | 28.000 | 13.500 | 7.000 | 30.000 | 21.000 | 35.200 | 23.250 | 36.000 | 14.000 | 10.250 |
|          | Goods    |        |        |        |        |        |        |        |       |        |        |        |        |        |        |        |
|          | coverage | 0.999  | 1.000  | 0.999  | 0.999  | 0.998  | 0.999  | 0.999  | 1.000 | 0.998  | 0.999  | 0.999  | 0.999  | 0.998  | 0.999  | 1.000  |

**Table S3. Comparison of prediction performance of different models.**

| Model | Ethyl lactate |                | Ethyl acetate |                |
|-------|---------------|----------------|---------------|----------------|
|       | MAPE          | R <sup>2</sup> | MAPE          | R <sup>2</sup> |
| ANN   | 26.517        | 0.645          | 15.925        | 0.481          |
| DT    | 19.121        | 0.508          | 25.051        | 0.289          |
| SVR   | 33.395        | 0.604          | 19.477        | 0.453          |

**Table S4. Predicted values of 19 differential metabolites.**

| Compounds                     | Contents (mg/kg) |        |        |        |        |
|-------------------------------|------------------|--------|--------|--------|--------|
|                               | 5                | 10     | 15     | 20     | 25     |
| Phenethyl alcohol             | 55.58            | 82.96  | 78.38  | 96.61  | 95.17  |
| 3-Methyl-1-butanol            | 47.21            | 66.17  | 66.25  | 73.21  | 70.05  |
| 2-Methyl-1-propanol           | 26.83            | 36.20  | 35.96  | 19.11  | 22.46  |
| 2,3-Butanediol                | 13.25            | 14.02  | 12.45  | 12.47  | 13.95  |
| 3-(Methylsulfanyl)-1-propanol | 2.15             | 1.94   | 2.15   | 1.39   | 1.27   |
| Ethyl oleate                  | 3.64             | 0.80   | 0.29   | 5.36   | 5.68   |
| Ethyl acetate                 | 130.21           | 200.28 | 187.63 | 187.03 | 246.89 |
| Ethyl caprylate               | 68.52            | 80.71  | 80.58  | 66.79  | 81.67  |
| Ethyl valerate                | 6.76             | 34.15  | 34.36  | 25.92  | 4.67   |
| Ethyl palmitate               | 6.77             | 11.98  | 11.00  | 13.57  | 13.96  |
| Ethyl laurate                 | 0.18             | 2.30   | 1.84   | 4.08   | 4.32   |
| Ethyl lactate                 | 121.37           | 126.62 | 102.57 | 164.85 | 239.08 |
| Ethyl nonanoate               | 2.87             | 3.23   | 2.99   | 0.08   | 0.20   |
| Ethyl hexanoate               | 41.24            | 83.11  | 83.83  | 56.91  | 28.42  |
| Ethyl caprate                 | 11.54            | 19.38  | 19.38  | 37.77  | 29.20  |
| Ethyl butanoate               | 5.64             | 37.26  | 38.12  | 28.35  | 13.91  |
| Diethyl succinate             | 92.38            | 78.63  | 75.20  | 234.80 | 275.01 |
| 4-Ethyl-2-methoxyphenol       | 2.45             | 2.31   | 2.63   | 5.17   | 4.18   |
| 3-Hydroxy-2-oxobutane         | 9.49             | 11.58  | 11.71  | 2.63   | -1.33  |

Figure captions

Figure S1. Venn diagram for metabolites in three *Digangs*.

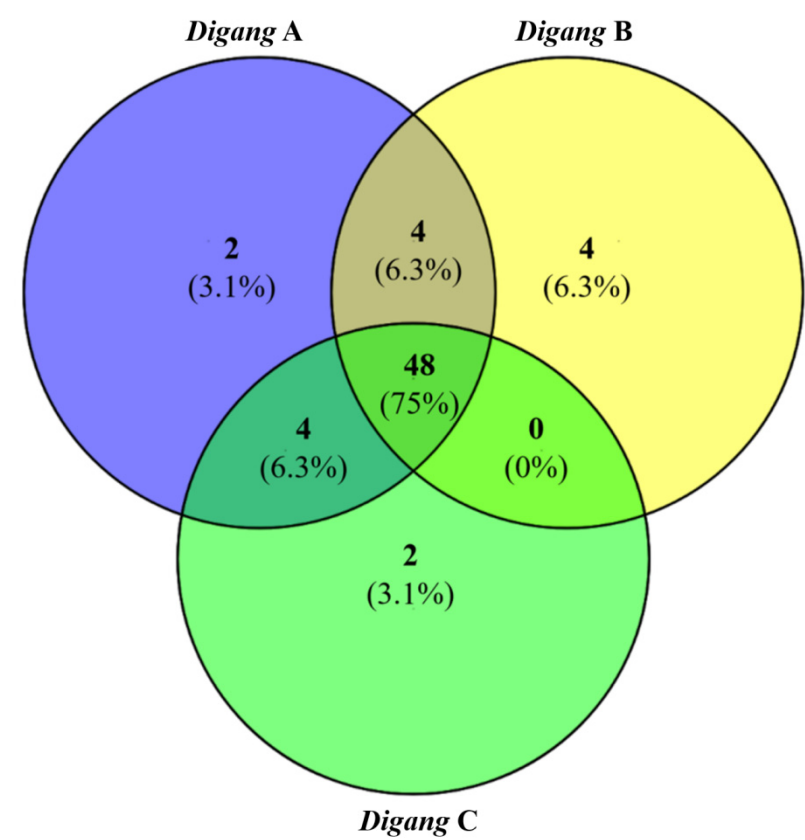



Figure S2. Comparison of aroma profiles of three *Digangs*. Significance: \*  $p < 0.05$ .

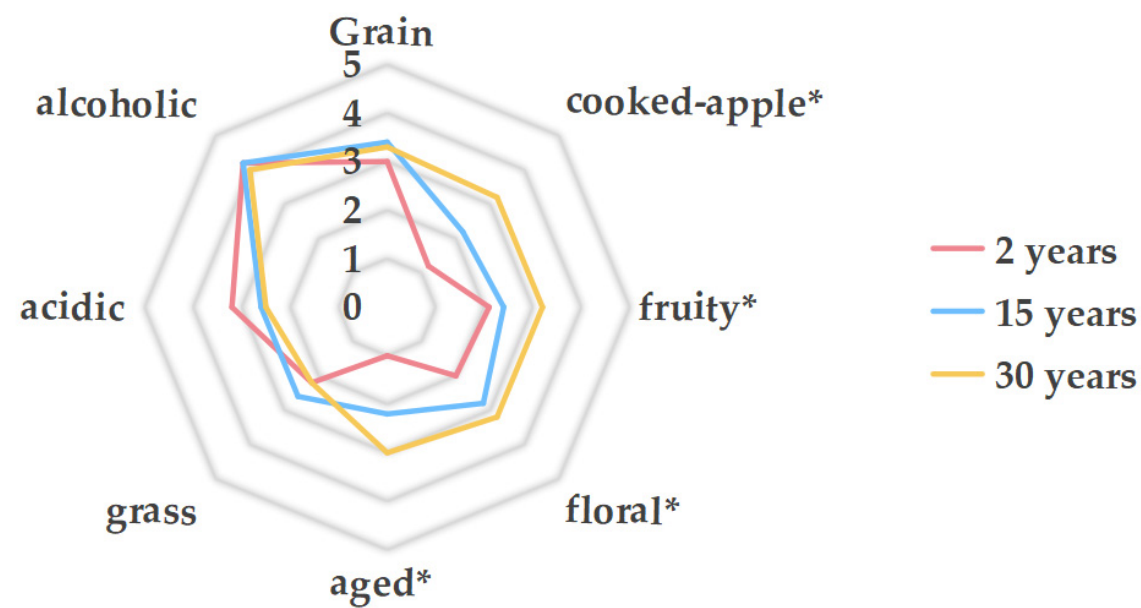

**Figure S3. Venn diagram for microorganism genus in three *Digangs*.** (a) Venn diagram for bacterial genera in three *Digangs*. (b) Venn diagram for fungal genera in three *Digangs*.

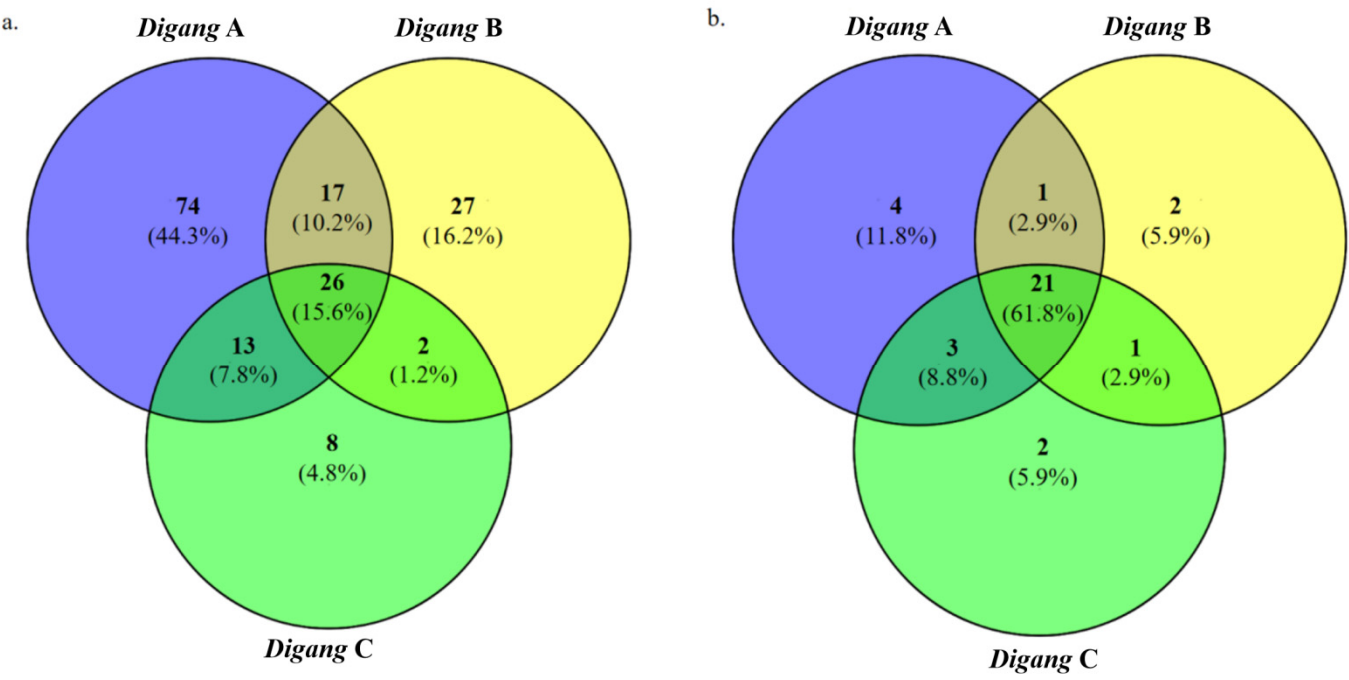

Figure S4. Fermentation temperature in three *Digangs*.

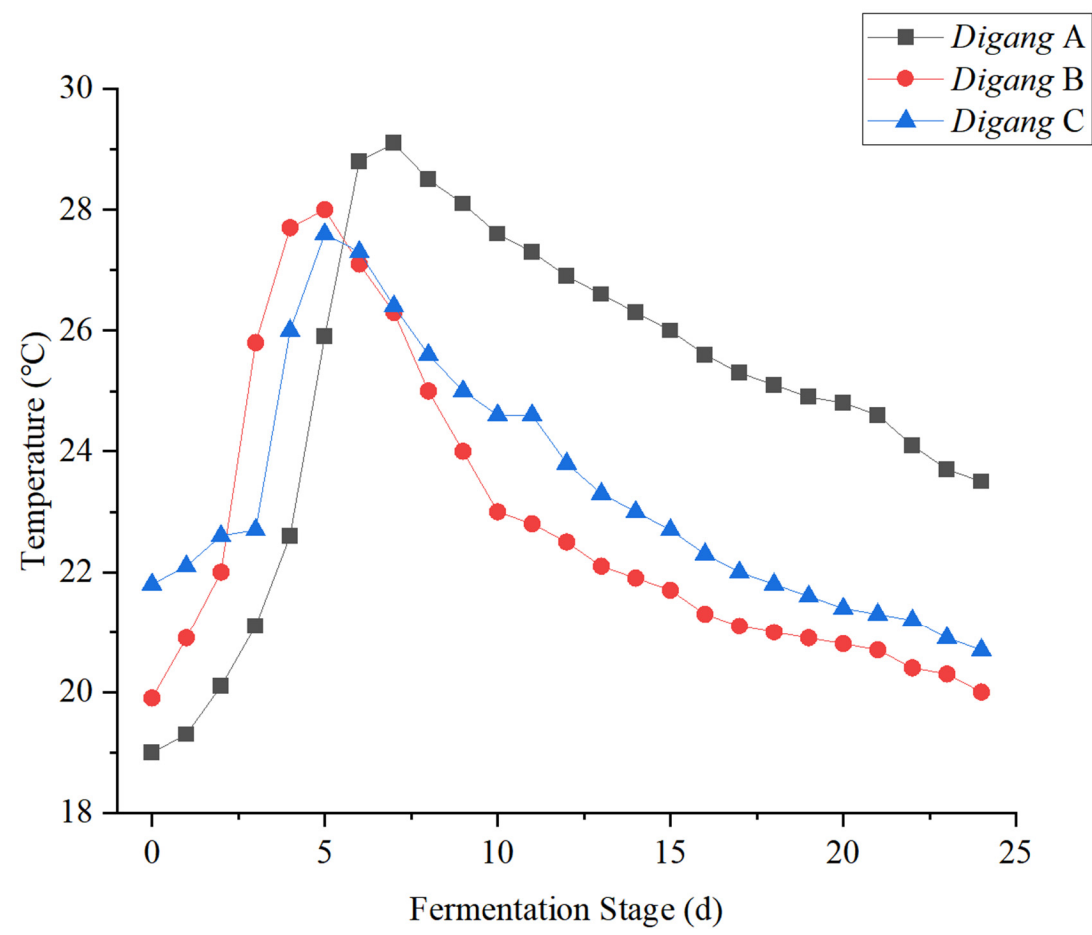

Supplement: s1 [file s1]
